# Supplementary material for: Frequency and isostericity of RNA base pairs
Source: PubMed Central journal article supplement — Nucleic Acids Res. 2009 Feb 24;37(7):2294–312. doi: 10.1093/nar/gkp011 (PMC2673412; doi:10.1093/nar/gkp011), 2009-02-24
Supplement: gkp011_1.pdf [file gkp011_1.pdf]

## Supplementary Material

for

### Frequency and Isostericity of RNA Basepairs

Jesse Stombaugh<sup>1,4</sup>, Craig L. Zirbel<sup>2,4</sup>, Eric Westhof<sup>5</sup>, and Neocles B. Leontis<sup>3,4,\*</sup>

<sup>1</sup>Department of Biological Sciences, <sup>2</sup>Department of Mathematics and Statistics, <sup>3</sup>Department of Chemistry and <sup>4</sup>Center for Biomolecular Sciences, Bowling Green State University, Bowling Green, OH 43403. <sup>5</sup>Architecture et réactivité de l'ARN, Université Louis Pasteur de Strasbourg, Institut de Biologie Moléculaire et Cellulaire du CNRS, 15 rue René Descartes, F-67084 Strasbourg, France.

\*To whom correspondence should be addressed

Telephone: (419) 372-8663

Fax: (419) 372-9809

Email: leontis@bgsu.edu

In addition to this pdf file, the supplementary material consists of these six additional files:

1. Stombaugh\_et\_al\_Sup\_Mat\_S1.fasta
2. Stombaugh\_et\_al\_Sup\_Mat\_S2.fasta
3. Stombaugh\_et\_al\_Sup\_Mat\_S3.fasta
4. Stombaugh\_et\_al\_Sup\_Mat\_S4.pdf
5. Stombaugh\_et\_al\_Sup\_Mat\_S6\_S7\_S8.xls
6. Stombaugh\_et\_al\_Sup\_Mat\_S9.xls

**Supplemental Material S1.** 5S rRNA sequence alignments. Sequence alignments were downloaded from the Rfam database and parsed to identify the most complete sequence for each species. SeqQR was used to reduce sequence redundancy as described in **Methods**. (See Stombaugh\_et\_al\_Sup\_Mat\_S1.fasta)

**Supplemental Material S2.** 16S rRNA sequence alignments. Sequence alignments were downloaded from the European Ribosomal database and parsed to identify the most complete sequence for each species. SeqQR was used to reduce sequence redundancy as described in **Methods**. (See Stombaugh\_et\_al\_Sup\_Mat\_S2.fasta)

**Supplemental Material S3.** 23S rRNA sequences alignments. Sequence alignments were downloaded from the European Ribosomal database and parsed to identify the most complete sequence for each species. SeqQR was used to reduce sequence redundancy as described in **Methods**. (See Stombaugh\_et\_al\_Sup\_Mat\_S3.fasta)

**Supplementary Material S4.** Reduced redundancy list of NDB/PDB files. This list comprises representative RNA containing PDB files selected as described in **Methods**. (See Stombaugh\_et\_al\_Sup\_Mat\_S4.pdf)

| Basepairs modeled in Leontis et al. (2002) that have been observed in 3D structures |         |      |     |      |                        |                  |                                         |      |                                         |      |                                         |      |                     |                                 |                                                     |      |      |
|-------------------------------------------------------------------------------------|---------|------|-----|------|------------------------|------------------|-----------------------------------------|------|-----------------------------------------|------|-----------------------------------------|------|---------------------|---------------------------------|-----------------------------------------------------|------|------|
|                                                                                     | BP Type | PDB  | NT1 | NT2  | Number of Observations | C1'-C1' Distance | 1 <sup>st</sup> H-bond: H-bonding atoms |      | 2 <sup>nd</sup> H-bond: H-bonding atoms |      | 3 <sup>rd</sup> H-bond: H-bonding atoms |      | # of H-Bond Matches | Difference in C1'-C1' Distances | Frequencies from Bacterial rRNA Sequence Alignments |      |      |
|                                                                                     |         |      |     |      |                        |                  | NT1                                     | NT2  | NT1                                     | NT2  | NT1                                     | NT2  |                     |                                 |                                                     |      |      |
| Predicted                                                                           | cWS     | -    | G   | -    | A                      | -                | -                                       | 8.5  | O6                                      | H2   | H11                                     | N3   | H21                 | O2'                             |                                                     |      |      |
| Observed                                                                            | cWS     | 2avy | G   | 394  | A                      | 366              | 1                                       | 8.6  | O6                                      | H2   | H11                                     | N3   | H21                 | O2'                             | 3/3                                                 | 0.1  | 1.4% |
| Predicted                                                                           | cWS     | -    | U   | -    | C                      | -                | -                                       | 6.5  | H3                                      | O2   | O2                                      | HO2' |                     |                                 |                                                     |      |      |
| Observed                                                                            | cWS     | 1lqg | U   | 185  | C                      | 233              | 1                                       | 7.1  | ---                                     | ---  | ---                                     | ---  |                     | 0/2                             | 0.6                                                 | 0.6% |      |
| Predicted                                                                           | cWS     | -    | U   | -    | U                      | -                | -                                       | 6.5  | H3                                      | O2   | O2                                      | HO2' |                     |                                 |                                                     |      |      |
| Observed                                                                            | cWS     | 1s72 | U   | 454  | U                      | 1362             | 1                                       | 6.1  | H3                                      | O2   | ---                                     | ---  |                     | 1/2                             | 0.4                                                 | 2.2% |      |
| Predicted                                                                           | tWS     | -    | A   | -    | C                      | -                | -                                       | 10.0 | H62                                     | HO2' | H61                                     | O2   |                     |                                 |                                                     |      |      |
| Observed                                                                            | tWS     | 1s72 | A   | 843  | C                      | 838              | 2                                       | 9.5  | H62                                     | HO2' | H61                                     | O2   |                     | 2/2                             | 0.5                                                 | 1.7% |      |
| Predicted                                                                           | tWS     | -    | A   | -    | U                      | -                | -                                       | 10.0 | H62                                     | O2'  | H61                                     | O2   |                     |                                 |                                                     |      |      |
| Observed                                                                            | tWS     | 1s72 | A   | 57   | U                      | 28               | 1                                       | 9.4  | H62                                     | O2'  | H61                                     | O2   |                     | 2/2                             | 0.6                                                 | 1.3% |      |
| Predicted                                                                           | tWS     | -    | U   | -    | U                      | -                | -                                       | 8.5  | O4                                      | OH2' | H3                                      | O2   |                     |                                 |                                                     |      |      |
| Observed                                                                            | tWS     | 1qrz | U   | 106  | U                      | 258              | 1                                       | 8.2  | ---                                     | ---  | H3                                      | O2   |                     | 1/2                             | 0.3                                                 | 1.0% |      |
| Predicted                                                                           | cHS     | -    | G   | -    | A                      | -                | -                                       | 7.6  | O6                                      | H2   |                                         |      |                     |                                 |                                                     |      |      |
| Observed                                                                            | cHS     | 2j01 | G   | 2052 | A                      | 2051             | 1                                       | 7.1  | O6                                      | H2   |                                         |      |                     | 1/1                             | 0.5                                                 | 1.6% |      |
| Predicted                                                                           | cHS     | -    | U   | -    | C                      | -                | -                                       | 7.0  | O2                                      | H5   |                                         |      |                     |                                 |                                                     |      |      |
| Observed                                                                            | cHS     | 1et4 | U   | 223  | C                      | 222              | 1                                       | 6.2  | O2                                      | H5   |                                         |      |                     | 1/1                             | 0.8                                                 | 1.2% |      |
| Predicted                                                                           | cSs     | -    | C   | -    | C                      | -                | -                                       | 5.6  | O2'                                     | HO2' | HO2'                                    | O2   |                     |                                 |                                                     |      |      |
| Observed                                                                            | cSs     | 1q86 | C   | 75   | C                      | 2542             | 1                                       | 5.8  | O2'                                     | HO2' | HO2'                                    | O2   |                     | 2/2                             | 0.2                                                 | 0.1% |      |
| Predicted                                                                           | cSs     | -    | G   | -    | C                      | -                | -                                       | 5.6  | O2'                                     | HO2' | HO2'                                    | O3   |                     |                                 |                                                     |      |      |
| Observed                                                                            | cSs     | 359d | G   | 50   | C                      | 152              | 13                                      | 6.2  | O2'                                     | HO2' | HO2'                                    | O3   |                     | 2/2                             | 0.6                                                 | 0.1% |      |
| Predicted                                                                           | cSs     | -    | G   | -    | U                      | -                | -                                       | 5.6  | O2'                                     | HO2' | HO2'                                    | O4   |                     |                                 |                                                     |      |      |
| Observed                                                                            | cSs     | 1s72 | G   | 871  | U                      | 866              | 7                                       | 5.9  | O2'                                     | HO2' | HO2'                                    | O4   |                     | 2/2                             | 0.3                                                 | 1.9% |      |
| Predicted                                                                           | tSs     | -    | G   | -    | A                      | -                | -                                       | 8.4  | N3                                      | H2   | H22                                     | N3   | H2                  | O2'                             |                                                     |      |      |
| Observed                                                                            | tSs     | 2aw4 | G   | 1750 | A                      | 2860             | 2                                       | 7.8  | ---                                     | ---  | H22                                     | N3   | ---                 | ---                             | 1/3                                                 | 0.6  | 1.2% |
| Modeled basepairs not observed in 3D structures                                     |         |      |     |      |                        |                  |                                         |      |                                         |      |                                         |      |                     |                                 |                                                     |      |      |
| Predicted                                                                           | cWH     | -    | A   | -    | U                      | -                | -                                       | 10.5 | H61                                     | O4   | N1                                      | H5   |                     |                                 |                                                     |      | 0.2% |
| Predicted                                                                           | cWH     | -    | C   | -    | U                      | -                | -                                       | 10.5 | H41                                     | O4   | N4                                      | H5   |                     |                                 |                                                     |      | 0.0% |
| Predicted                                                                           | tWS     | -    | C   | -    | U                      | -                | -                                       | 9.4  | H42                                     | O2'  | H41                                     | O2   |                     |                                 |                                                     |      | 0.3% |
| Predicted                                                                           | cSs     | -    | U   | -    | U                      | -                | -                                       | 5.3  | O2'                                     | HO2' | HO2'                                    | O5   |                     |                                 |                                                     |      | 0.2% |

**Supplemental Table S5.** Comparison of basepairs predicted by Leontis et al. (2002) with instances found using FR3D in 3D structures published since 2002. Only four predicted basepairs have still not been observed (lower part of table).

**Supplementary Material S6.** Isosteric Matrices (IM) for each geometric family showing IDI values for all base combinations that occur in that geometric basepair family. In some otherwise symmetric families, namely cWW, cHH, and tHH, the AA, CC, GG, and UU basepairs are not symmetric and so appear in the IDI table twice. Because in tWW, the AA, CC, GG, UU basepairs are perfectly symmetric, there is no need to list them twice. Finally, with cSS and tSS, the basepairs are not symmetric at all, and so all basepairs appear twice. The columns and rows of this Excel file may need to be re-sized for readability. (See "Sup\_Mat\_S6" worksheet in Stombaugh\_et\_al\_Sup\_Mat\_S6\_S7\_S8.xls)

**Supplementary Material S7.** IDI values calculated for all base combinations within each geometric basepair family. The columns and rows of this Excel file may need to be re-sized for readability. (See "Sup\_Mat\_S7" worksheet in Stombaugh\_et\_al\_Sup\_Mat\_S6\_S7\_S8.xls)

**Supplementary Material S8.** Basepair frequencies from 5S, 16S and 23S Bacterial sequence alignments, *E.c.* and *T.th.* 3D structures, and reduced redundancy set of 3D structures. Frequencies from the Bacterial sequence alignments were calculated using the Bacterial “conserved core” for each molecule (5S, 16S and 23S), determined from the 3D structural alignments (see **Supplemental Table S9**). The columns and rows of this Excel file may need to be re-sized for readability. (See “Sup\_Mat\_S8” worksheet in Stombaugh\_et\_al\_Sup\_Mat\_S6\_S7\_S8.xls)

**Supplementary Material S9.** 3D structural alignments for 5S, 16S and 23S rRNAs of *E.c.* and *T.th.* For the 5S and 23S rRNA alignments the *H.m.* structures are included. The 3D alignment for each rRNA appears as a separate worksheet. The IDI values are color-coded as in previous IDI tables. IDIs were calculated between aligned basepairs of *E.c.* and *T.th.* using basepair exemplars for the basepair detected by FR3D (column “M”) or using the coordinates from the 3D structures (column “N”). When the IDI values were greater than 3.3, the basepair positions were analyzed manually and the reason for the high IDI was identified (column “O”) as one of four possibilities: (1) Same base combination and same basepair family, but difference in 3D modeling leading to higher IDI than calculated from exemplars; (2) Isosteric or near isosteric base combination and same basepair family, but difference in 3D modeling leading to higher IDI than calculated from exemplars; (3) Non-isosteric base combination and same basepair family; (4) Basepair is adjacent to a variable Motif. The columns and rows of this Excel file may need to be re-sized for readability. (See Stombaugh\_et\_al\_Sup\_Mat\_S9.xls)

#### **Supplementary Material References**

1. Schuwirth, B.S., Borovinskaya, M.A., Hau, C.W., Zhang, W., Vila-Sanjurjo, A., Holton, J.M. and Cate, J.H. (2005) Structures of the bacterial ribosome at 3.5 Å resolution. *Science*, **310**, 827-834.
2. Selmer, M., Dunham, C.M., Murphy, F.V.t., Weixlbaumer, A., Petry, S., Kelley, A.C., Weir, J.R. and Ramakrishnan, V. (2006) Structure of the 70S ribosome complexed with mRNA and tRNA. *Science*, **313**, 1935-1942.
3. Wimberly, B.T., Brodersen, D.E., Clemons, W.M., Jr., Morgan-Warren, R.J., Carter, A.P., Vornrhein, C., Hartsch, T. and Ramakrishnan, V. (2000) Structure of the 30S ribosomal subunit. *Nature*, **407**, 327-339.
4. Klein, D.J., Moore, P.B. and Steitz, T.A. (2004) The roles of ribosomal proteins in the structure assembly, and evolution of the large ribosomal subunit. *Journal of molecular biology*, **340**, 141-177.
