# Supplementary material for: Frequency and isostericity of RNA base pairs
Source: PubMed Central journal article supplement — Nucleic Acids Res. 2009 Feb 24;37(7):2294–312. doi: 10.1093/nar/gkp011 (PMC2673412; doi:10.1093/nar/gkp011), 2009-02-24
Supplement: gkp011_2.pdf [file gkp011_2.pdf]

Reduced Redundancy List of PDB Files:

157d  
1a34  
1a9n  
1b23  
1b7f  
1by4  
1c04  
1c0a  
1csl  
1cvj  
1d4r  
1ddy  
1dfu  
1di2  
1dpl  
1dqf  
1drz  
1duq  
1e7k  
1e8o  
1ec6  
1efw  
1egk  
1ehz  
1et4  
1evp  
1flt  
1f27  
1f7u  
1feu  
1fir  
1fuf  
1g1x  
1gax  
1grz  
1h3e  
1h4s  
1hnh  
1hq1  
1hr2  
1hvu  
1i2x  
1i2y  
1i6u  
1i9v  
1i9x  
1id9  
1il2  
1j1u  
1j2b  
1j5e  
1j8g  
1j9h  
1jbr  
1jbs  
1jbt  
1jid  
1jzv  
1k8w  
1k9w  
1kd3

1kh6  
1kog  
1kuq  
1kxk  
1l2x  
1l3z  
1l9a  
1lng  
1lnt  
1m5o  
1m8v  
1mfq  
1mhk  
1mji  
1mme  
1mms  
1mzp  
1n35  
1n38  
1n78  
1n7a  
1nbs  
1nlc  
1nta  
1nuj  
1nyi  
1ob2  
1ooa  
1p6v  
1pwf  
1q2r  
1q96  
1q9a  
1qa6  
1qbp  
1qc0  
1qf6  
1qtq  
1qu2  
1qzw  
1r3e  
1r9f  
1r9s  
1rc7  
1rlg  
1rna  
1rpu  
1s03  
1s72  
1sdr  
1ser  
1sz1  
1t0d  
1t0e  
1t0k  
1tfw  
1tfy  
1ttt  
1u0b  
1u1y  
1u63  
1u6b

1u9s  
1un6  
1urn  
1utd  
1vfg  
1wsu  
1wz2  
1x8w  
1xjr  
1xok  
1xpe  
1y0q  
1y26  
1y69  
1y77  
1ykv  
1yls  
1yrj  
1ytu  
1yvp  
1yyk  
1yyw  
1yz9  
1yzd  
1z7f  
1zbh  
1zci  
1zdj  
1zdk  
1ze2  
1zev  
1zft  
1zh5  
1zho  
1zse  
1zx7  
205d  
246d  
259d  
280d  
2a04  
2a0p  
2a2e  
2a43  
2a64  
2ab4  
2ann  
2anr  
2ao5  
2avy  
2aw4  
2awe  
2az0  
2azx  
2b2d  
2b3j  
2b63  
2bgg  
2bh2  
2bj6  
2bq5  
2bs0

2bte  
2bu1  
2c4y  
2c4z  
2c50  
2c51  
2cky  
2ct8  
2czj  
2d6f  
2der  
2det  
2deu  
2dlc  
2dr2  
2dr8  
2du3  
2e9r  
2e9t  
2e9z  
2ec0  
2ez6  
2f8k  
2f8s  
2fcx  
2fcz  
2fk6  
2fmt  
2fqn  
2g32  
2g3s  
2g5k  
2g91  
2g92  
2g9c  
2gdi  
2gis  
2gjw  
2grb  
2gxb  
2h1m  
2hoj  
2hop  
2hvy  
2hw8  
2i82  
2i91  
2il9  
2ipy  
2iy5  
2iz9  
2izn  
2j01  
2nok  
2npy  
2nqp  
2nr0  
2nre  
2nue  
2nug  
2nz4  
2oe5

2oEU  
2oiu  
2oiy  
2oue  
2ozb  
2p7e  
2pjp  
2pwt  
2pxl  
2q1o  
2qBz  
2qux  
2r20  
2r22  
2r8s  
2r92  
2r93  
2rfk  
2tra  
2uwm  
2v3c  
2v6w  
2val  
2z75  
315d  
332d  
353d  
354d  
361d  
364d  
377d  
387d  
397d  
398d  
3b31  
3bso  
3tra  
402d  
409d  
418d  
419d  
420d  
422d  
429d  
430d  
433d  
434d  
435d  
438d  
439d  
466d  
472d  
485d  
488d  
5msf  
6msf  
7msf
